# Supplementary material for: Synthesis and biological evaluation of novel asymmetric naphthalene diimide derivatives as anticancer agents depending on ROS generation
Source: Royal Society of Chemistry journal article supplement (doi:10.1039/c8md00265g), 2018-01-01

## Supplementary Information

### Synthesis, and biological evaluation of novel asymmetric naphthalene diimide derivative as anticancer agent depending on ROS generation

Xiaojuan Xu<sup>a,b,#</sup>, Senzhen Wang<sup>a,#</sup>, Yuan Chang<sup>a</sup>, Chaochao Ge<sup>a</sup>, Xinna Li<sup>a</sup>, Yongli Feng<sup>a</sup>, Song-qiang Xie<sup>c</sup>, Chaojie Wang<sup>a</sup>, Fujun Dai<sup>\*,a</sup>, Wen Luo<sup>\*,a</sup>

<sup>a</sup> Key Lab of Natural Medicine and Immune Engineering, Henan University, Kaifeng 475004, China

<sup>b</sup> Pharmaceutical College, Henan University, Kaifeng 475004, China

<sup>c</sup> Institute of Chemical Biology, Henan University, Kaifeng 475004, China

**Corresponding author:**

\*Tel/ Fax: +86 15938573755/ +86 371 22864665; E-mail: fjdwl@hotmail.com, fjdwl@vip.henu.edu.cn.

\*Tel/ Fax: +86 15225477220/ +86 371 22864665; E-mail: luowen83@henu.edu.cn.

**Figure S1.** Structure and Spectra of target compounds.

*<sup>1</sup>H NMR spectra of compound 3a*

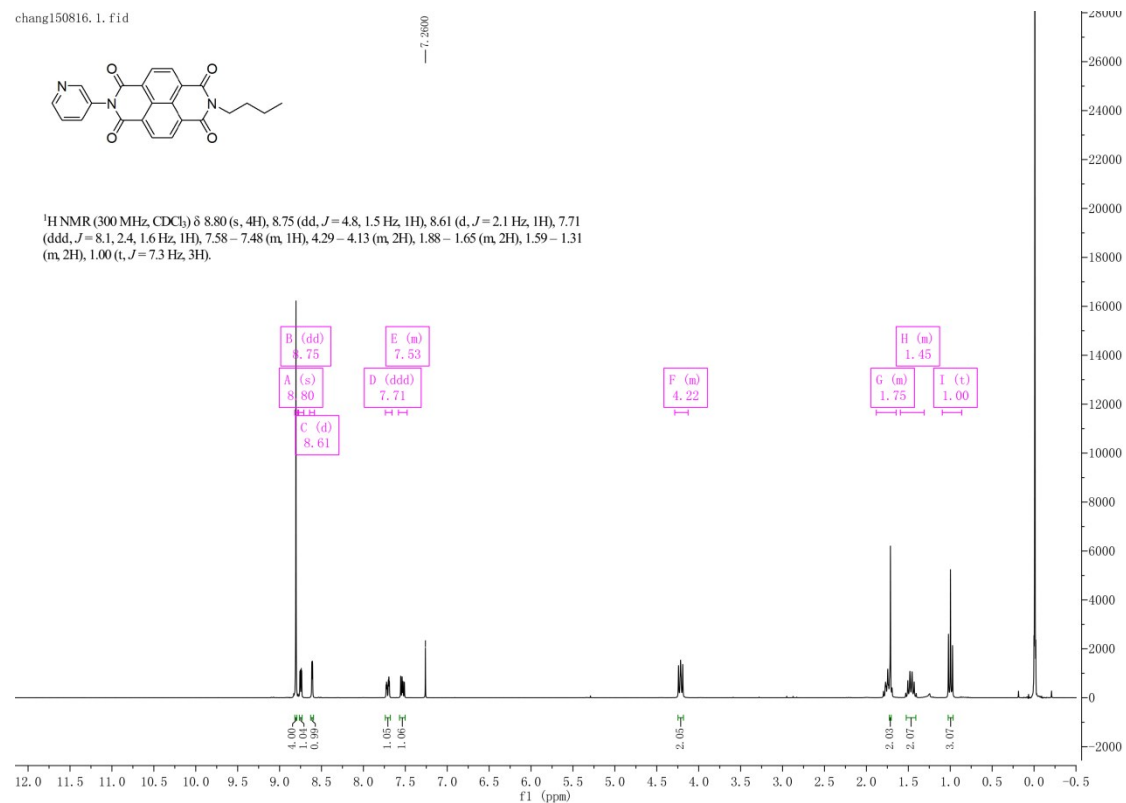

*<sup>13</sup>C NMR spectra of compound 3a*

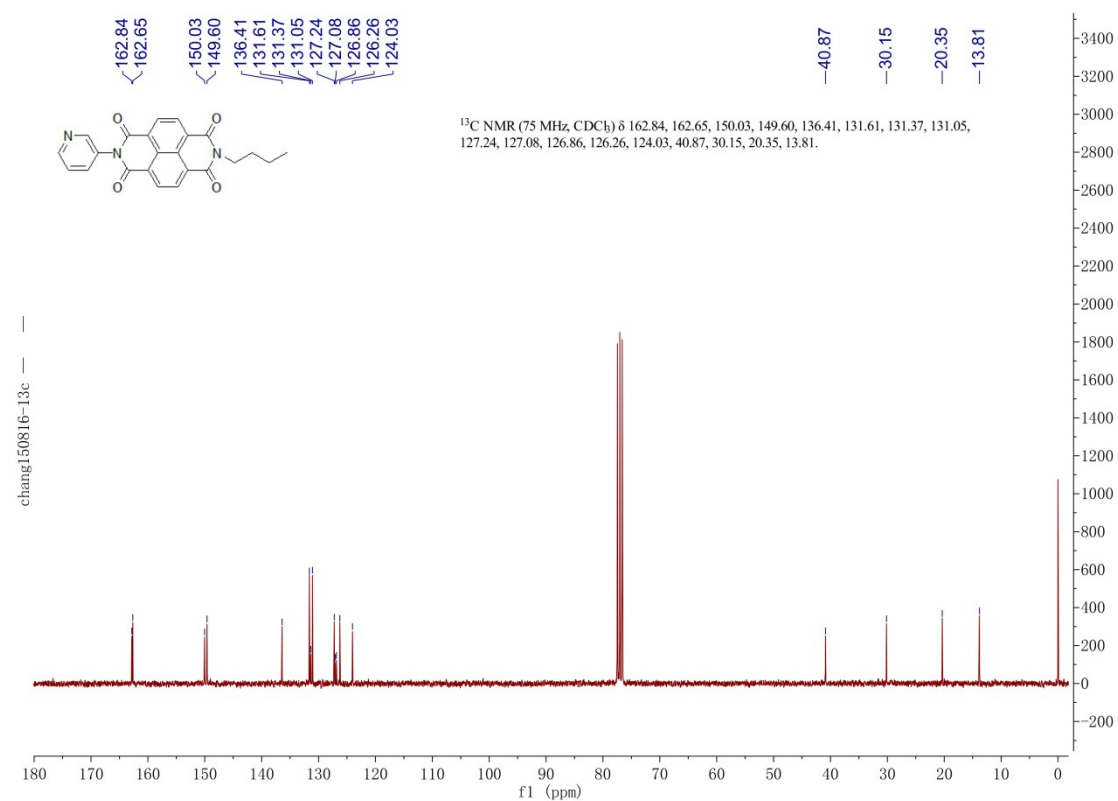

# <sup>1</sup>H NMR spectra of compound 3b

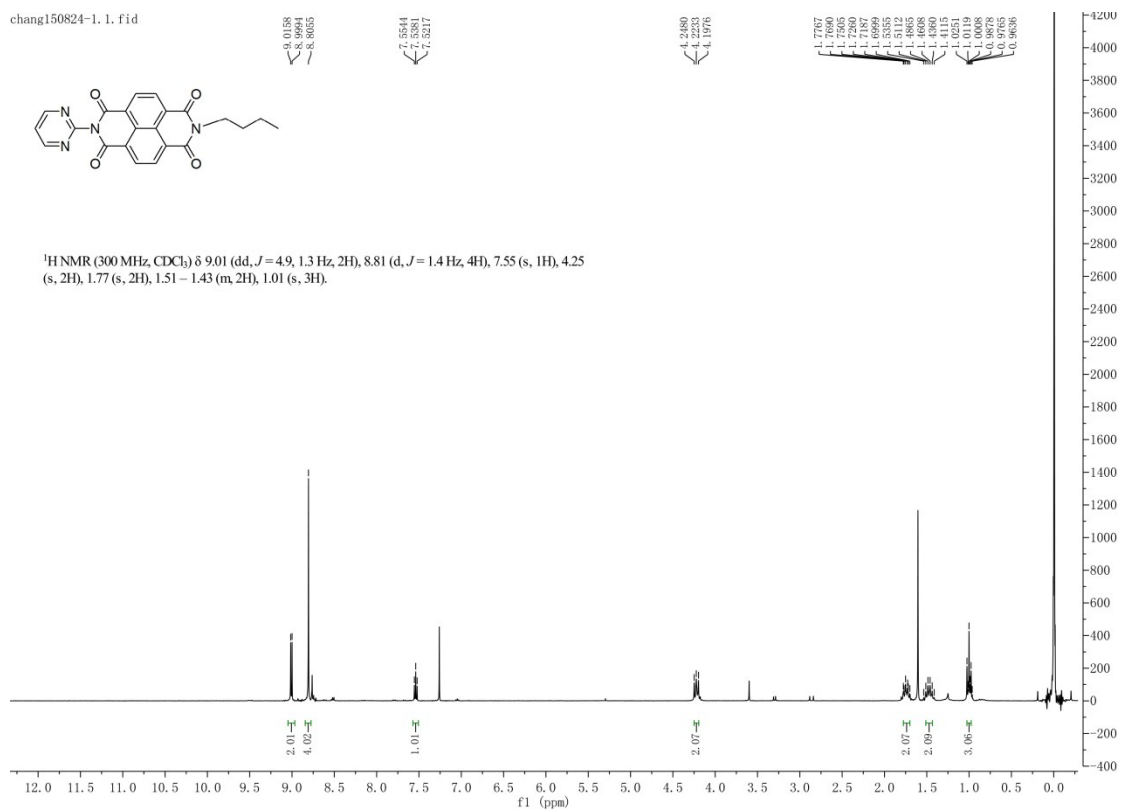

# <sup>13</sup>C NMR spectra of compound 3b

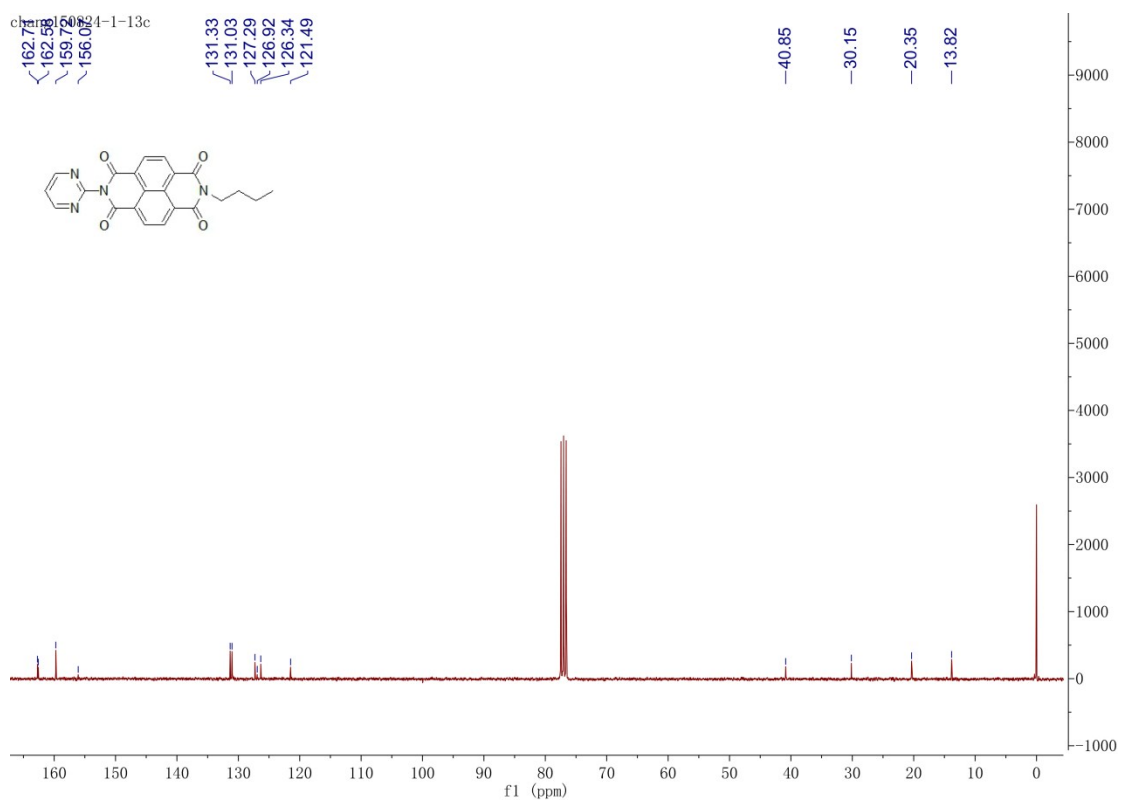

### <sup>1</sup>H NMR spectra of compound 3c

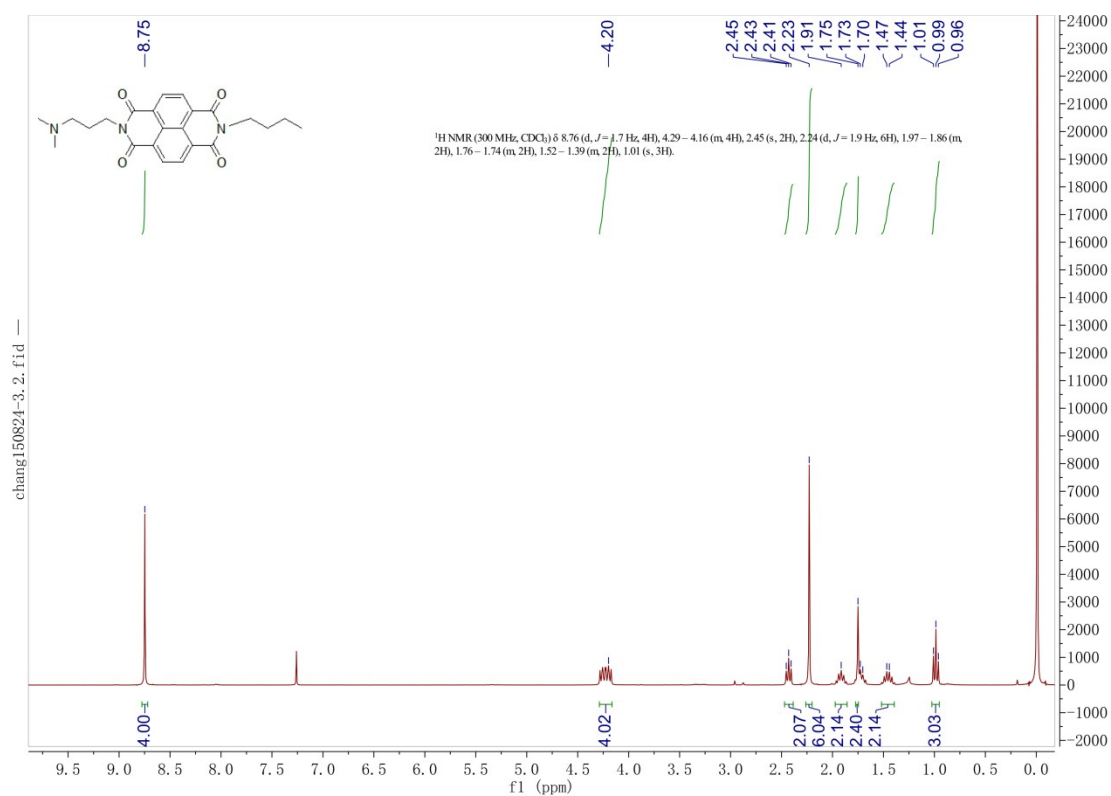

### <sup>13</sup>C NMR spectra of compound 3c

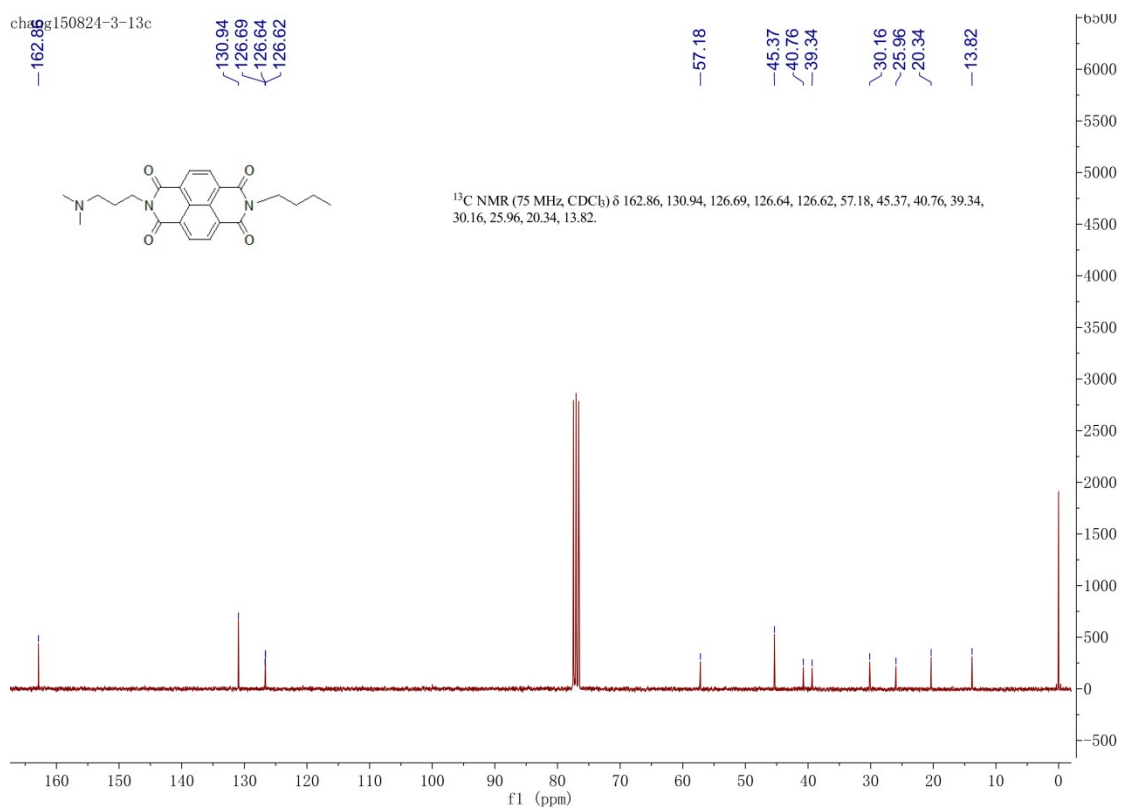

## <sup>1</sup>H NMR spectra of compound 3d

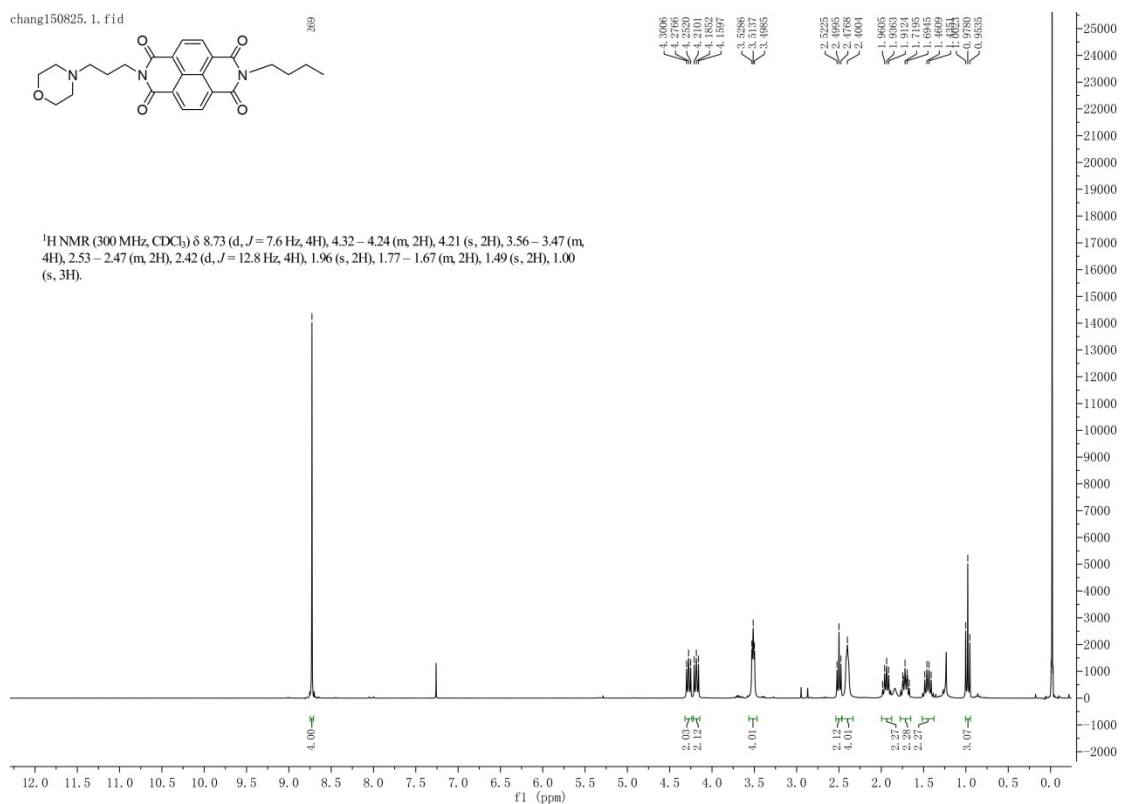

## <sup>13</sup>C NMR spectra of compound 3d

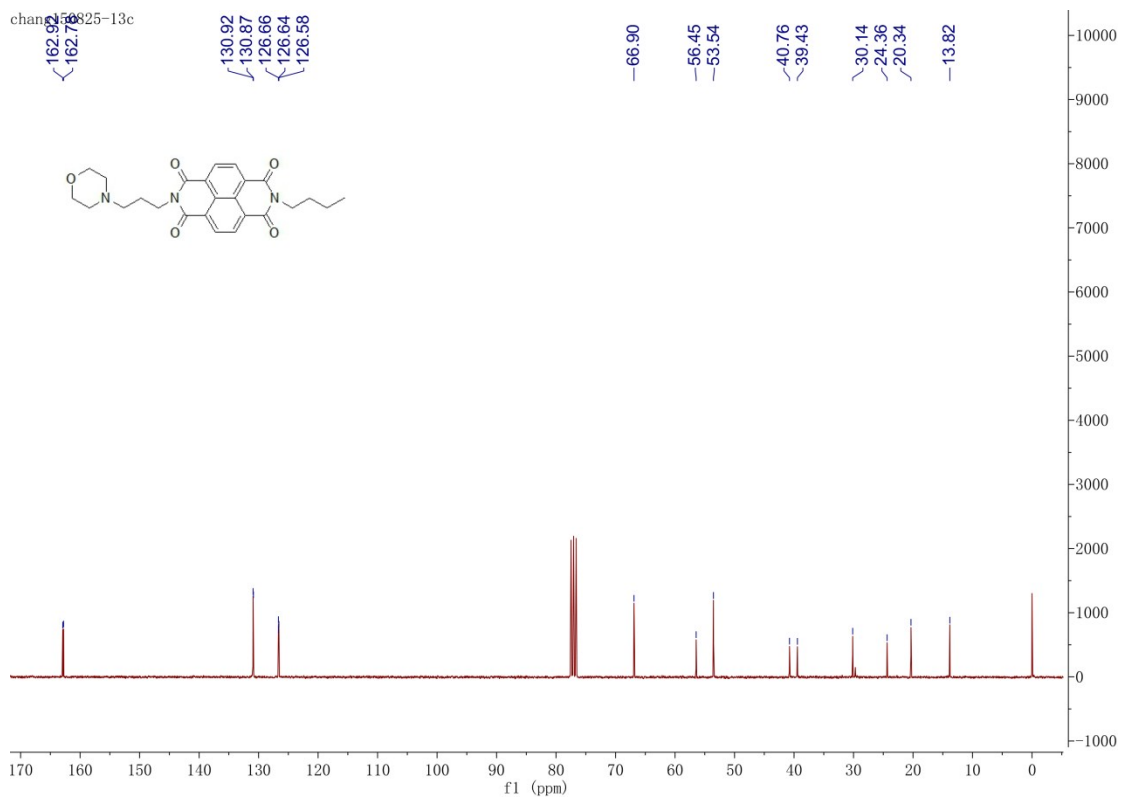

### $^1\text{H}$ NMR spectra of compound 3e

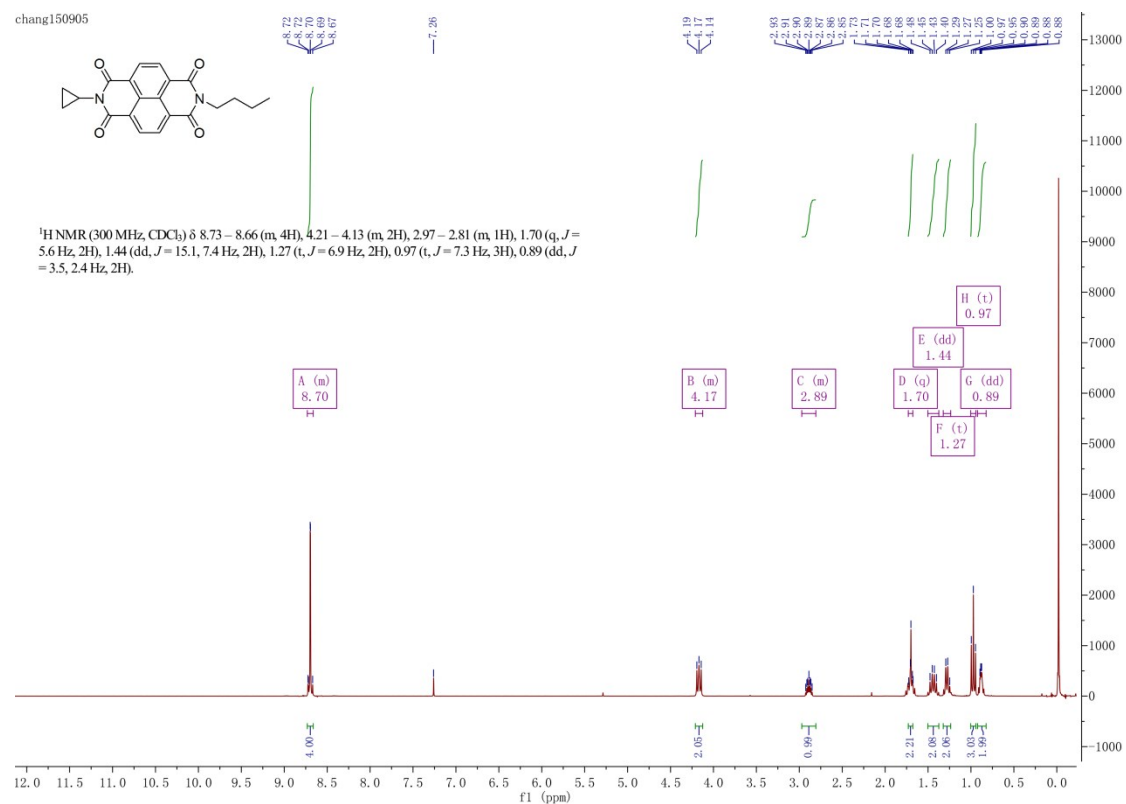

### $^{13}\text{C}$ NMR spectra of compound 3e

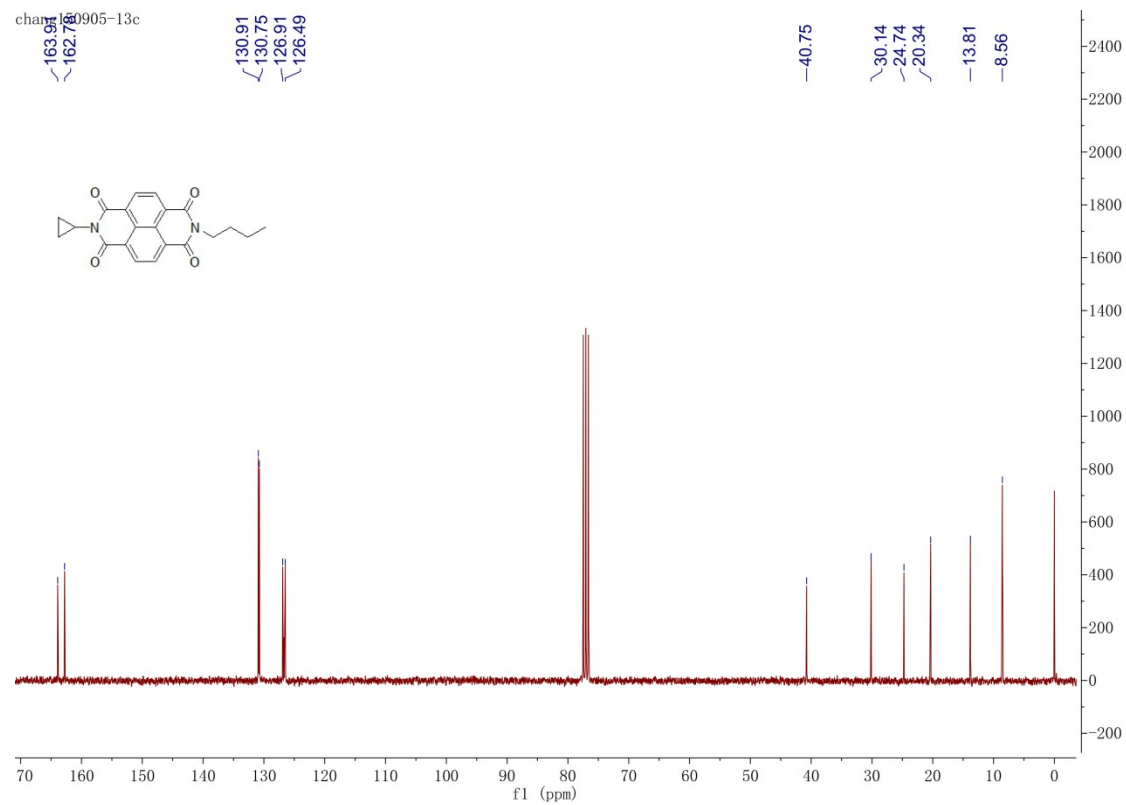

## <sup>1</sup>H NMR spectra of compound 3f

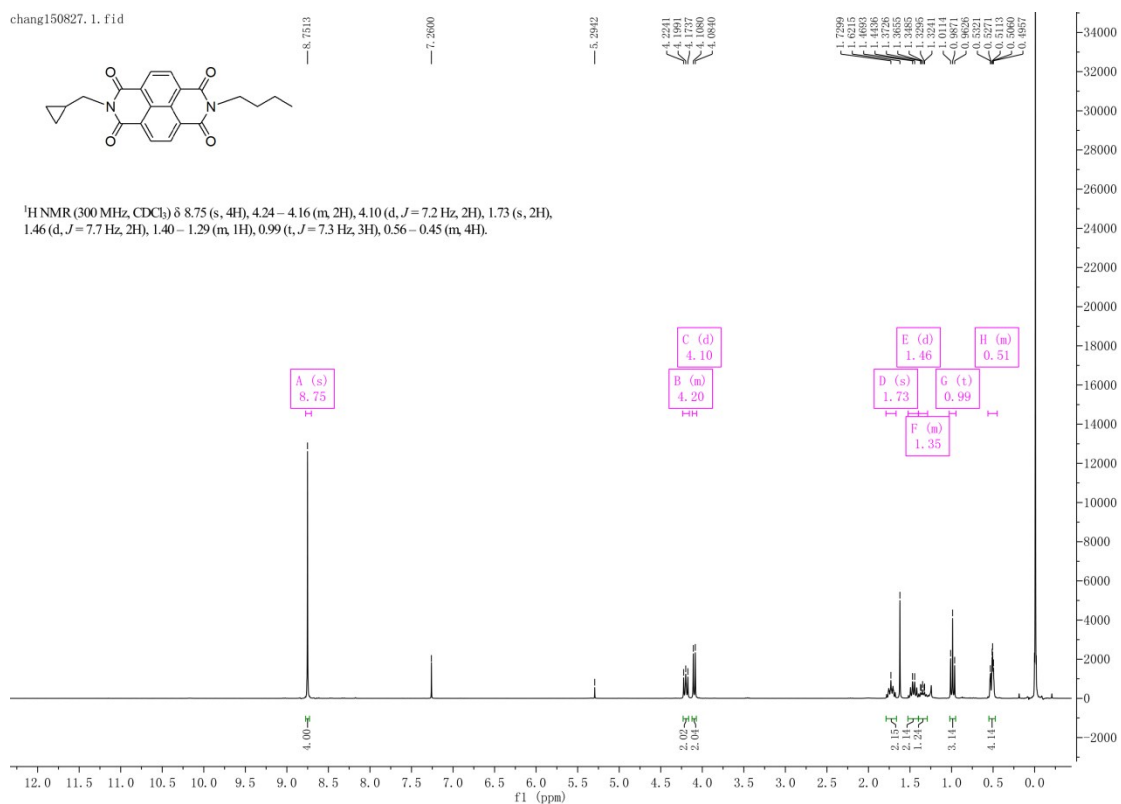

## <sup>13</sup>C NMR spectra of compound 3f

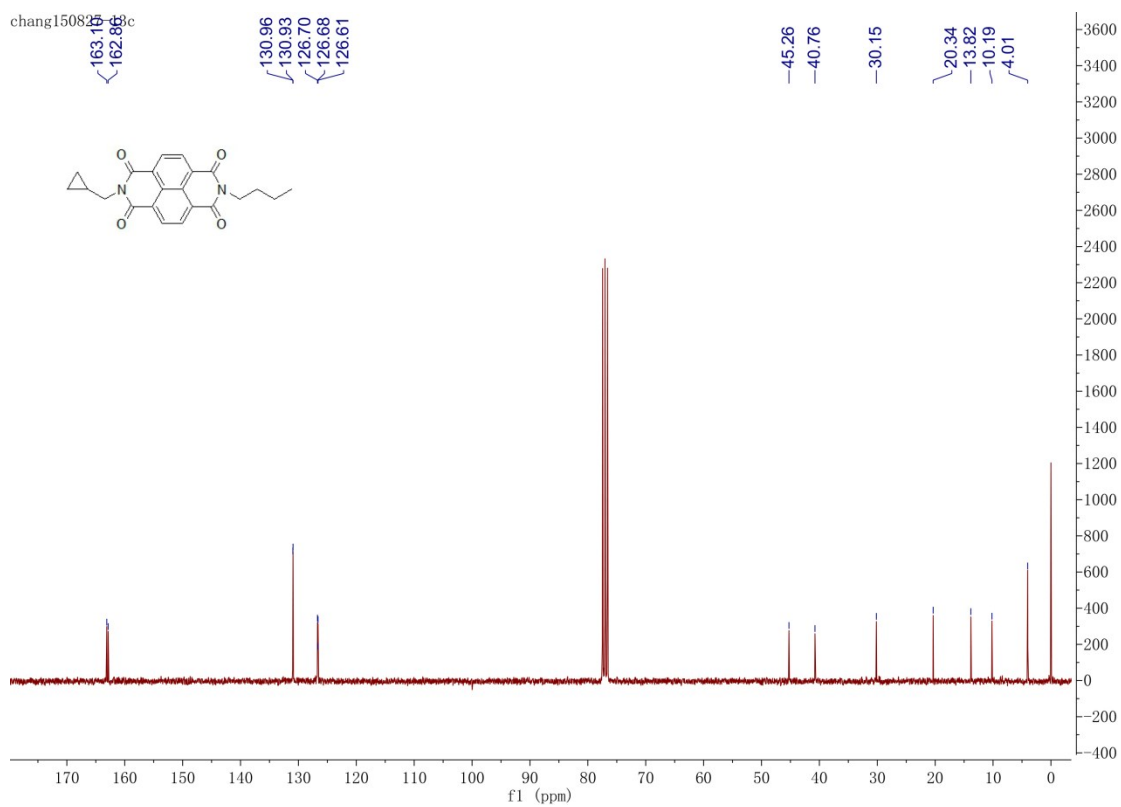

## <sup>1</sup>H NMR spectra of compound 3g

chang150901.1.fid

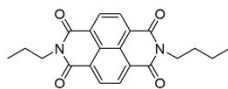

<sup>1</sup>H NMR (300 MHz, CDCl<sub>3</sub>) δ 8.74 (s, 4H), 4.24–4.12 (m, 4H), 1.74 (ddt, *J* = 12.2, 7.7, 6.6 Hz, 4H), 1.53–1.35 (m, 2H), 1.00 (dt, *J* = 12.5, 7.4 Hz, 6H).

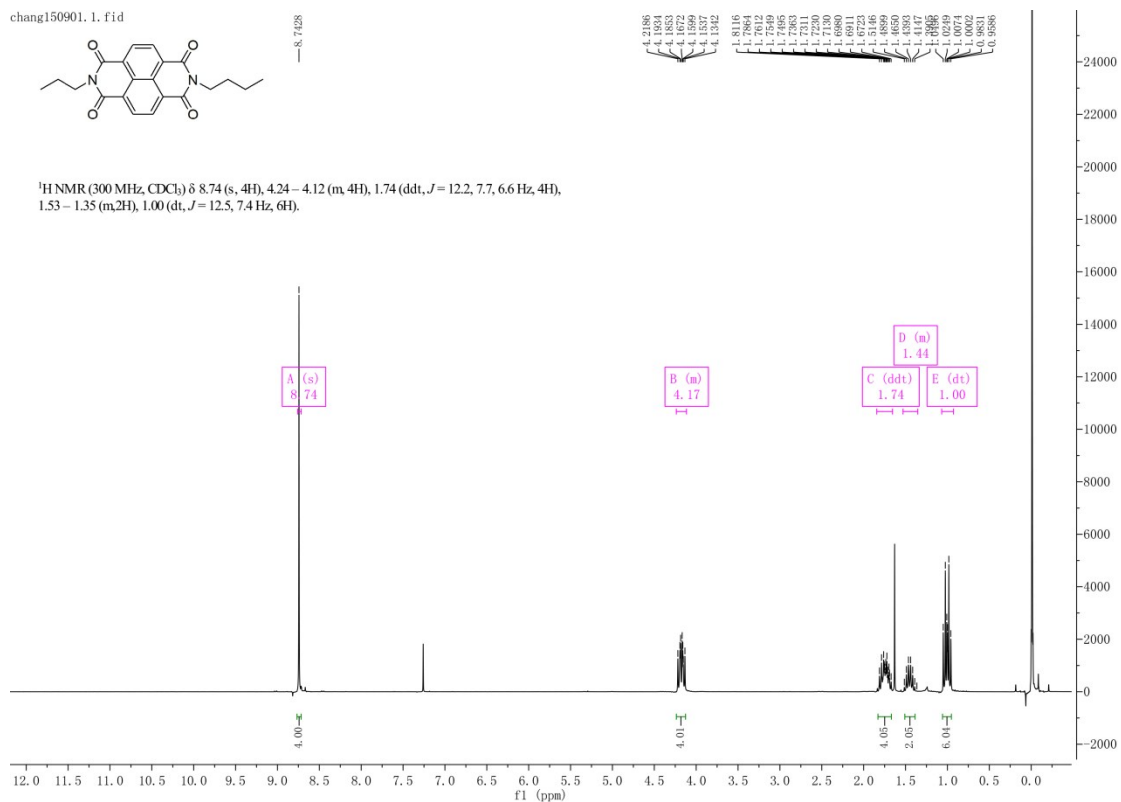

## <sup>13</sup>C NMR spectra of compound 3g

chang150901-13c

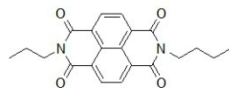

<sup>13</sup>C NMR (75 MHz, CDCl<sub>3</sub>) δ 162.85, 130.95, 130.93, 126.67, 126.61, 126.60, 42.42, 40.75, 30.15, 21.37, 20.34, 13.82, 11.49.

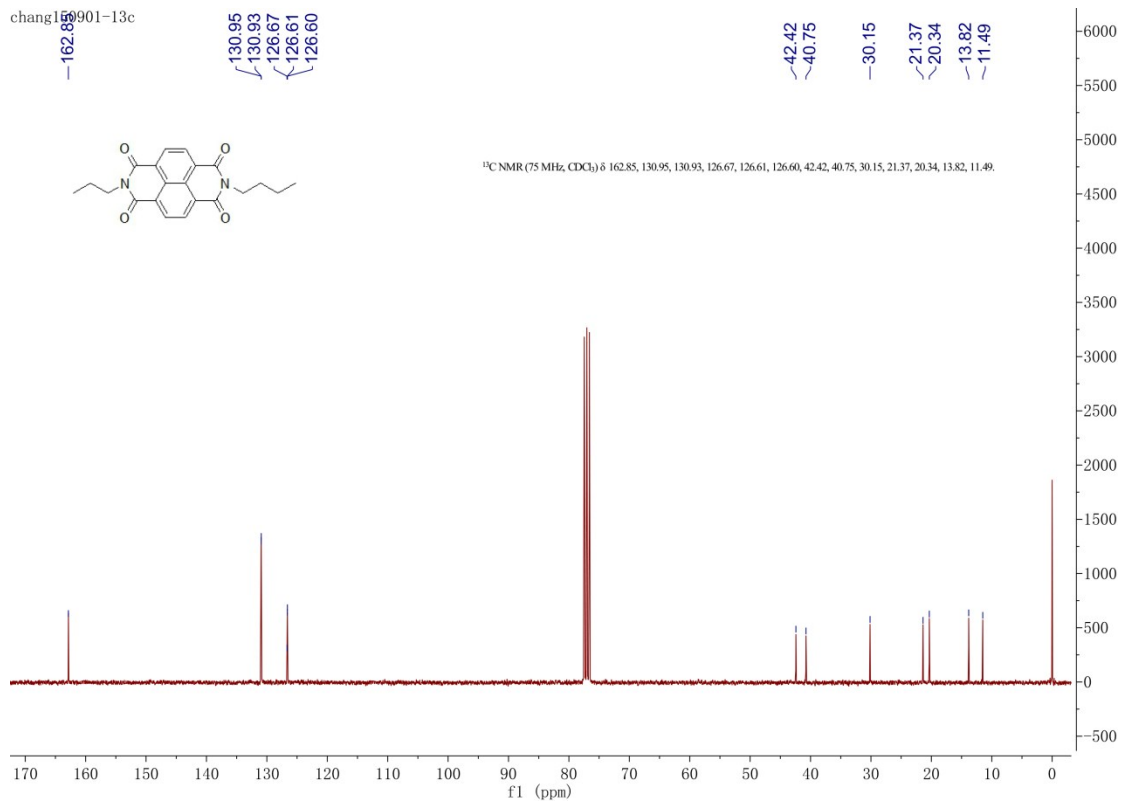



### <sup>1</sup>H NMR spectra of compound 3h

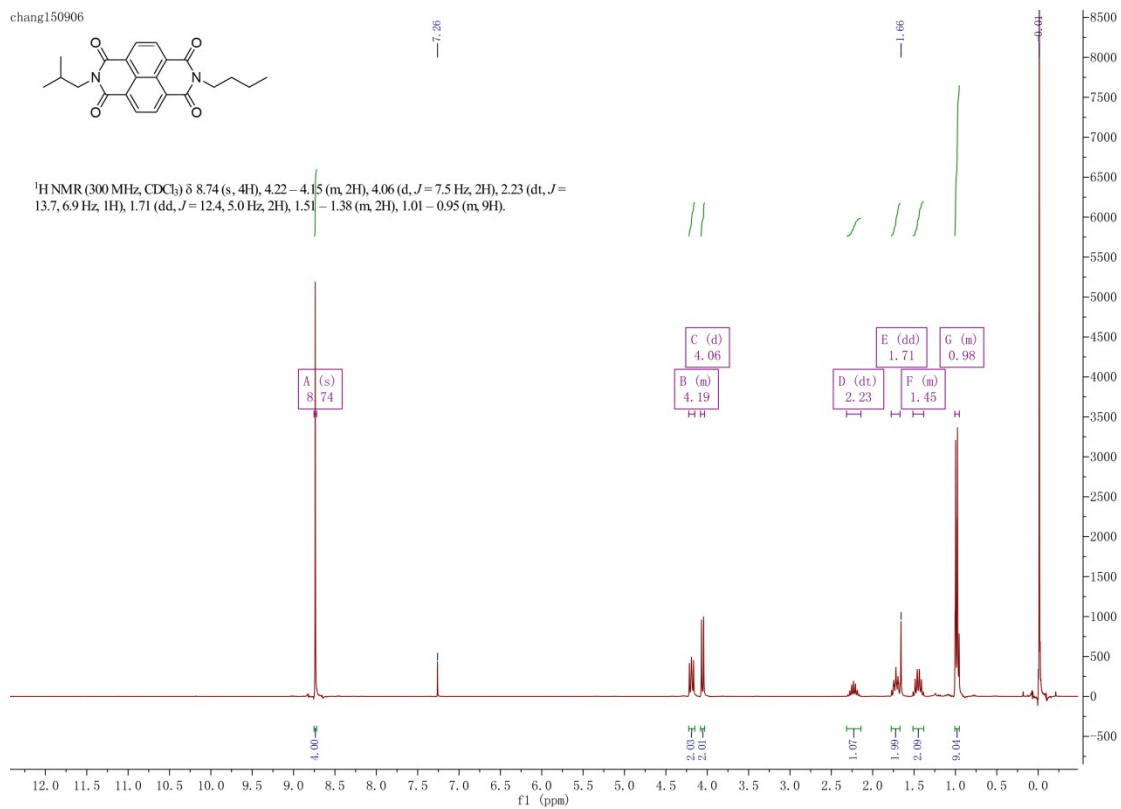

### <sup>13</sup>C NMR spectra of compound 3h

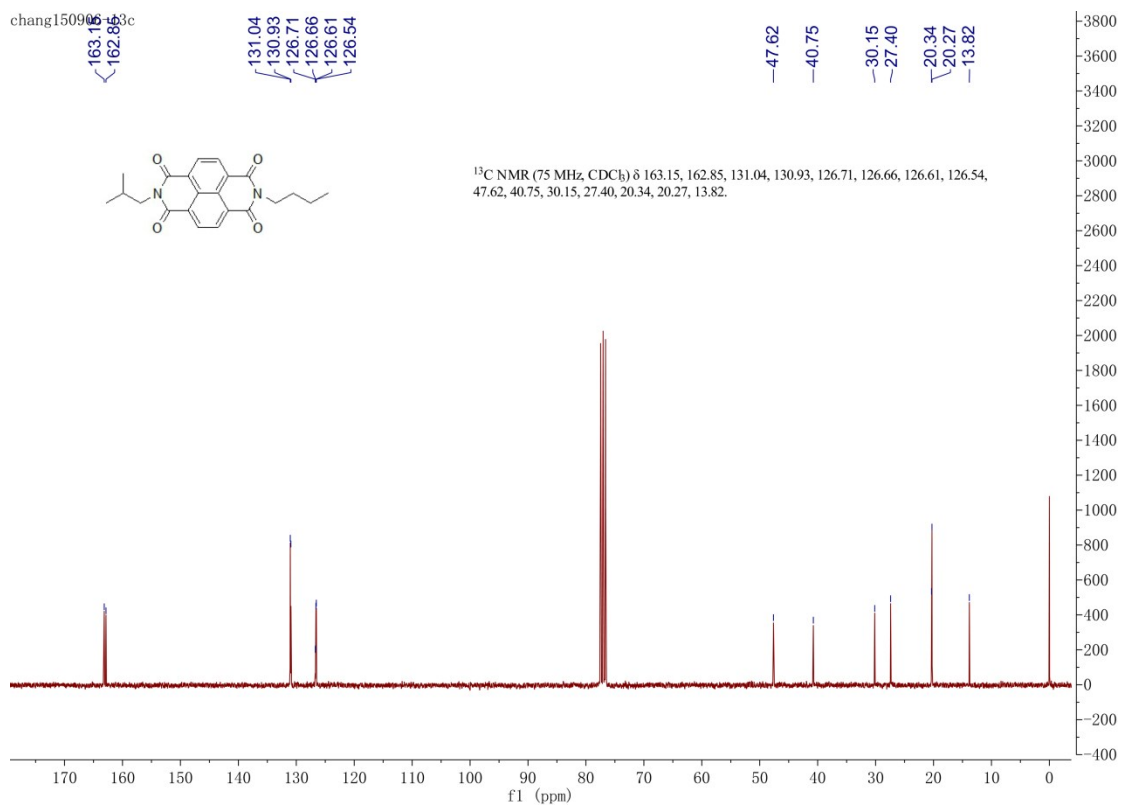

## <sup>1</sup>H NMR spectra of compound 3i

chang150903.1.fid

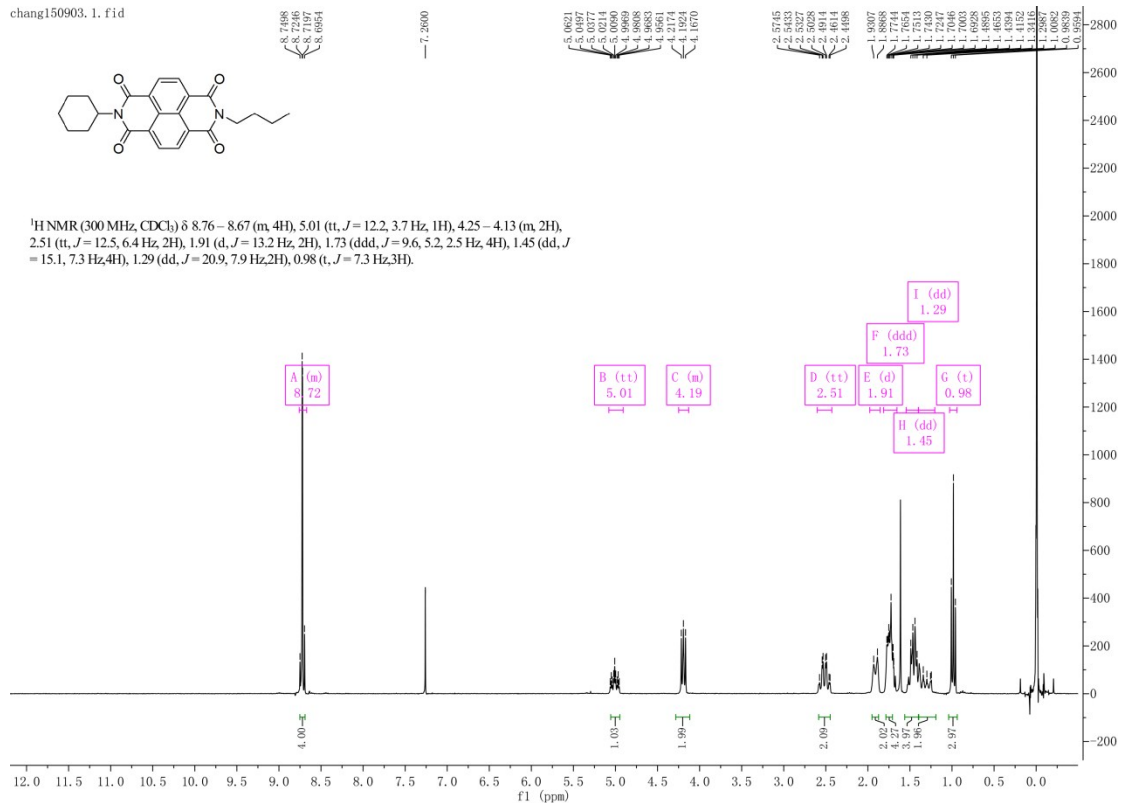

## <sup>13</sup>C NMR spectra of compound 3i

chang150903-13c

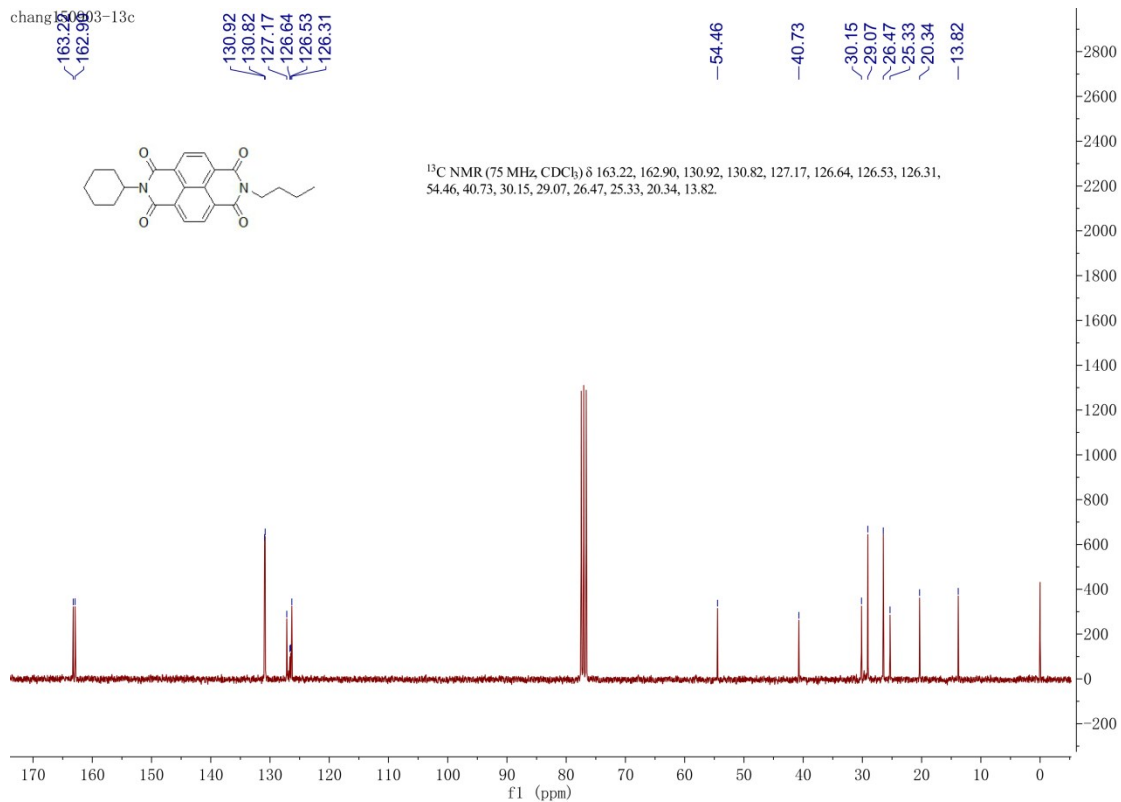

### <sup>1</sup>H NMR spectra of compound 4a

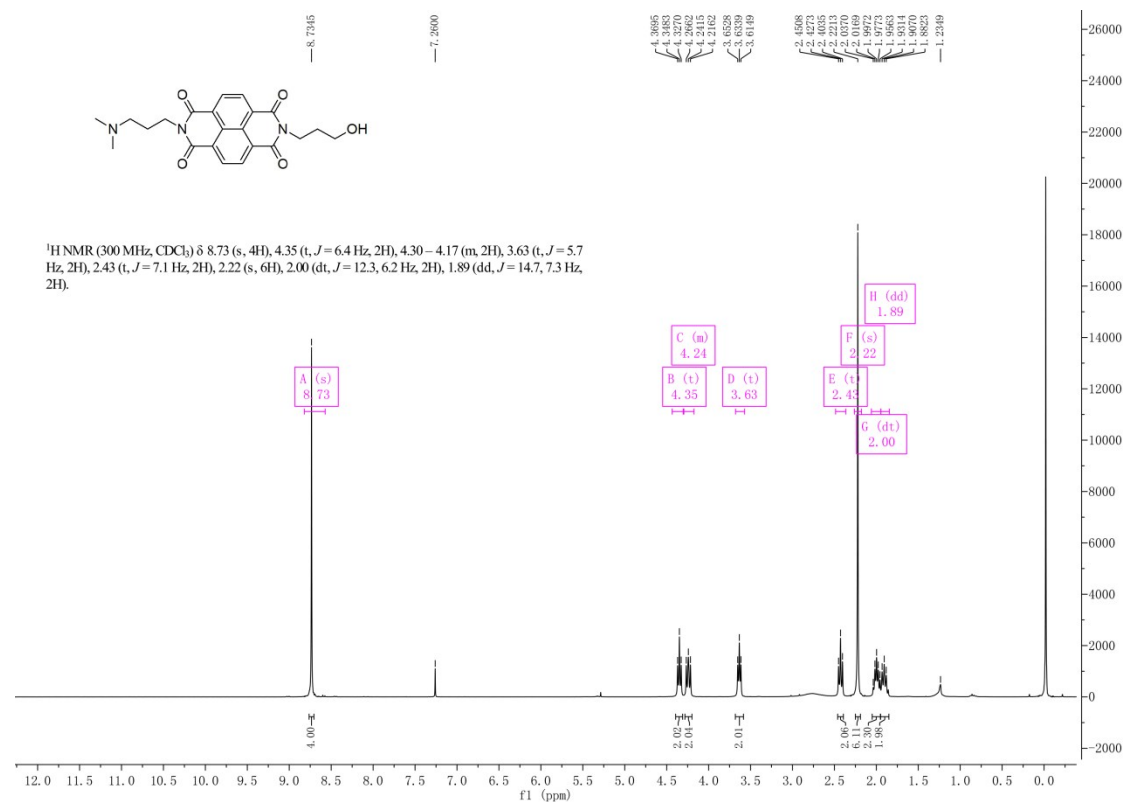

### <sup>13</sup>C NMR spectra of compound 4a

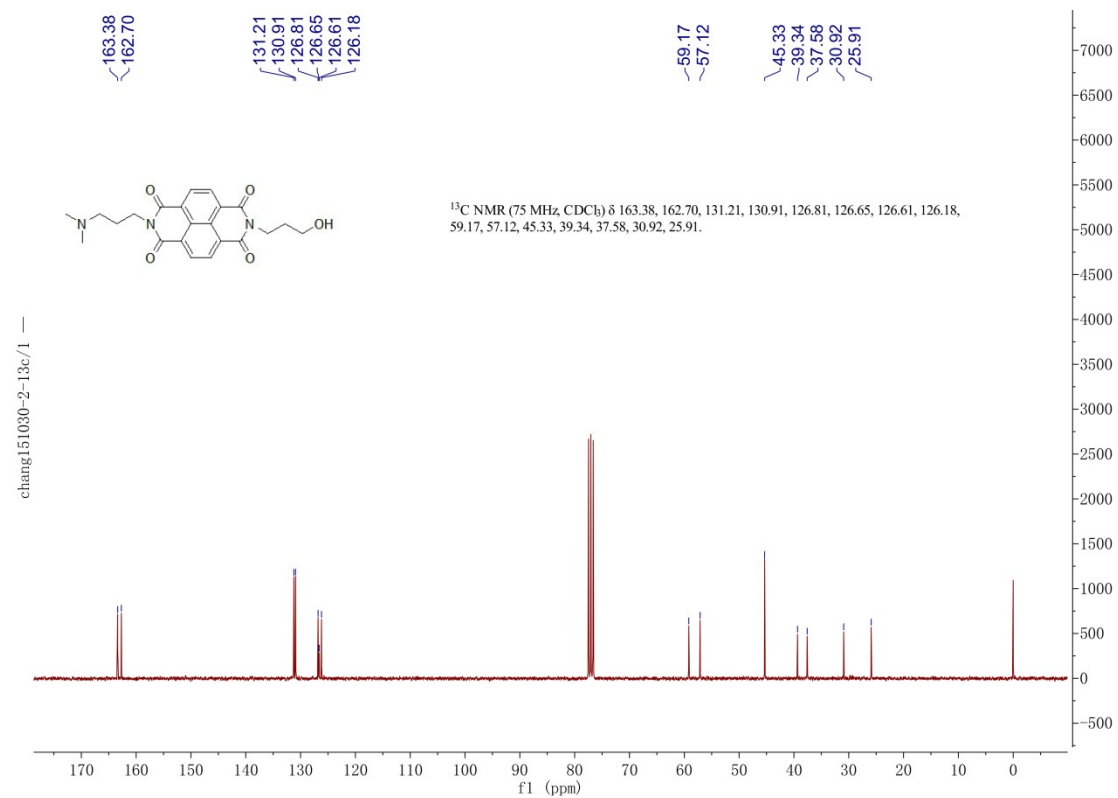

### <sup>1</sup>H NMR spectra of compound 4b

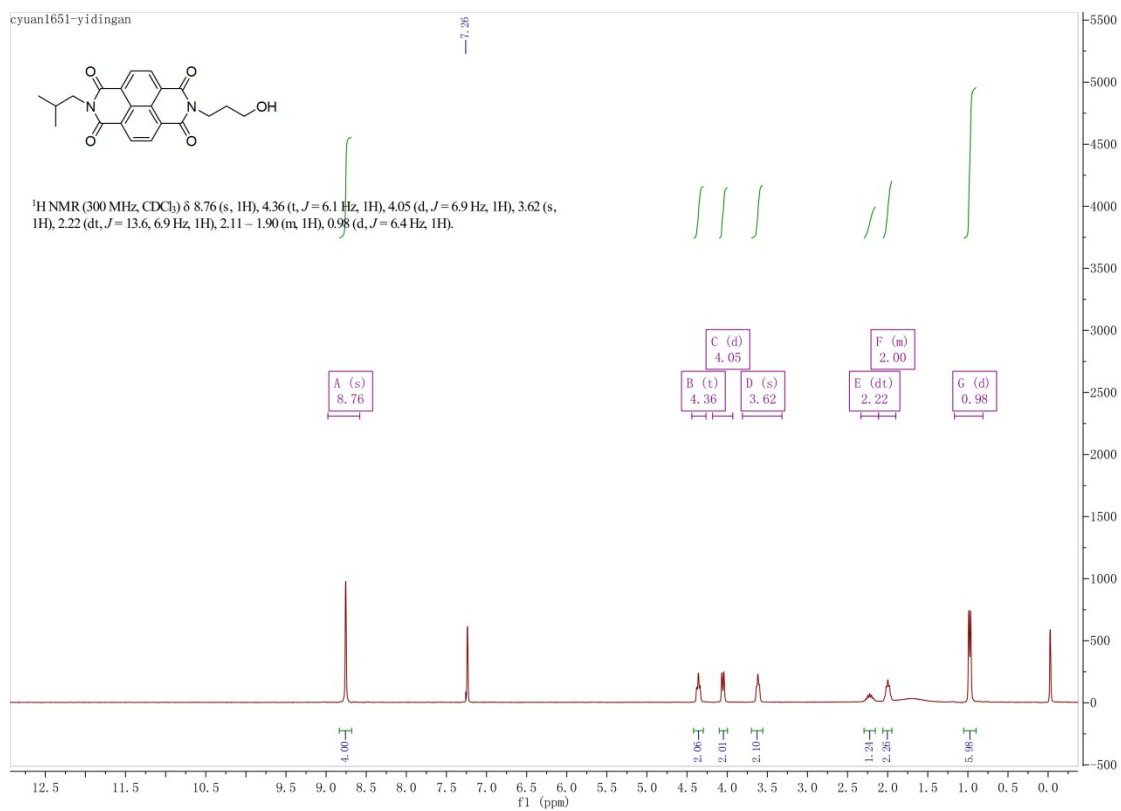

### <sup>13</sup>C NMR spectra of compound 4b

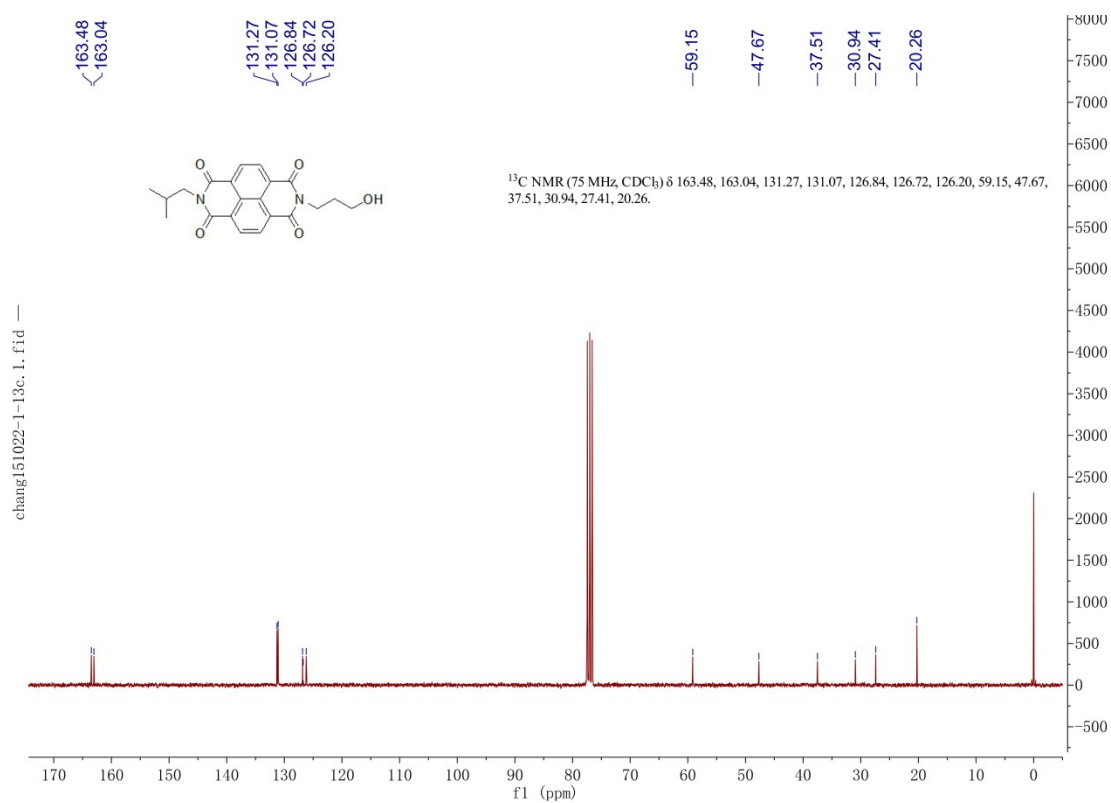

### <sup>1</sup>H NMR spectra of compound 4c

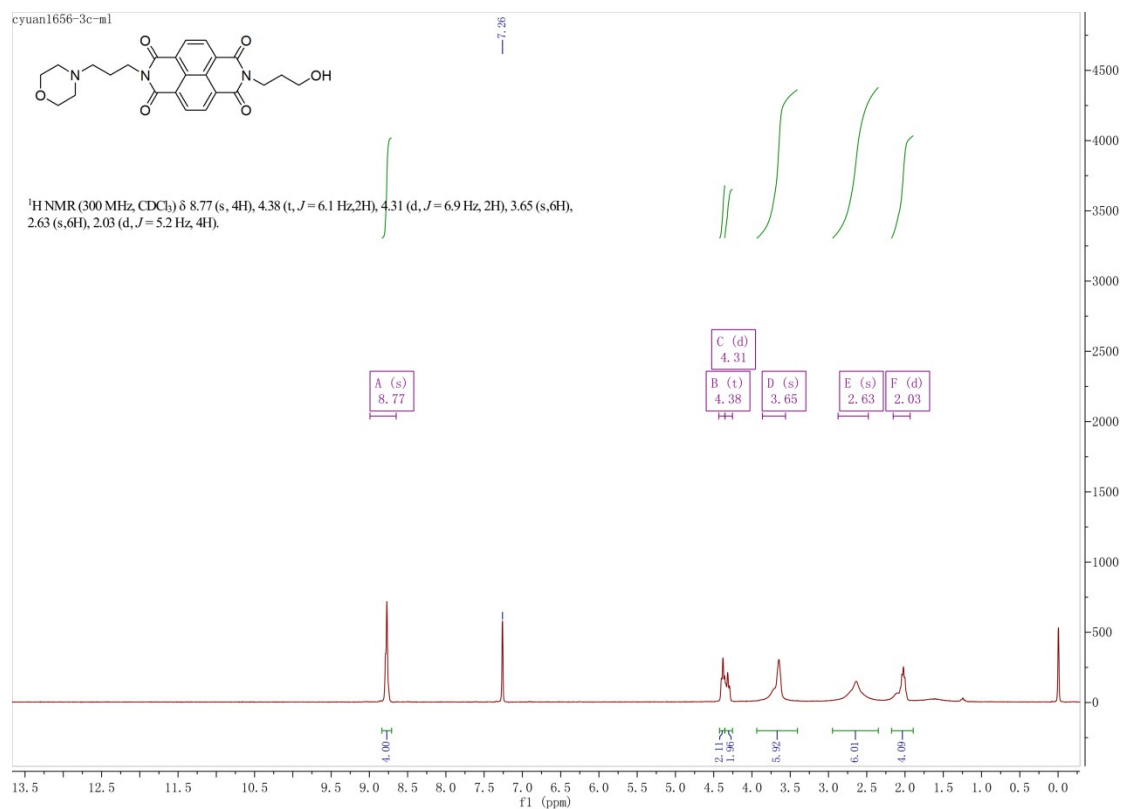

### <sup>13</sup>C NMR spectra of compound 4c

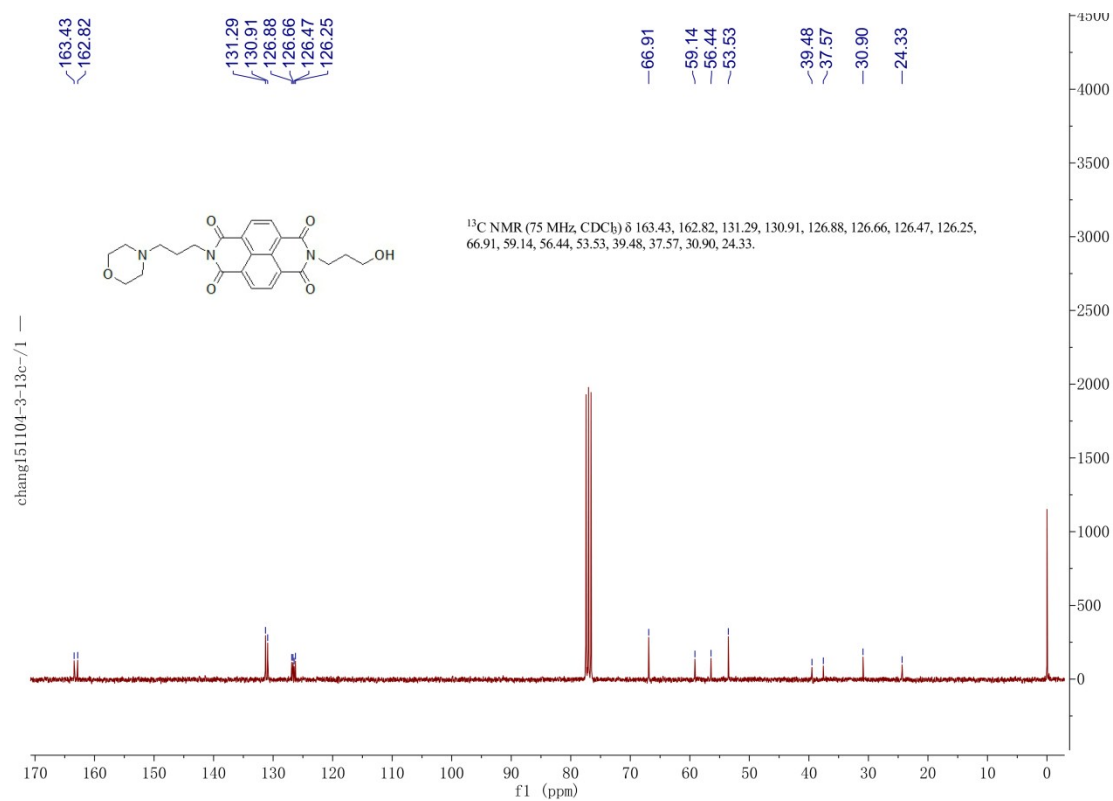

Supplement: c8md00265g1.pdf [file c8md00265g1.pdf]
